# Supplementary material for: New developments in incremental heating detrital 40 Ar∕ 39 Ar lithic (DARL) geochronology using Icelandic river sand
Source: Copernicus journal article supplement (doi:10.5194/gchron-6-683-2024), 2024-12-20
Supplement: Supplementary file 1 [file gchron-6-683-2024-supplement.zip]

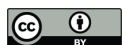

## *Supplement of*

# **New developments in incremental heating detrital $^{40}\text{Ar}/^{39}\text{Ar}$ lithic (DARL) geochronology using Icelandic river sand**

**Odinaka Okwueze et al.**

*Correspondence to:* Kevin Konrad ([kevin.konrad@oregonstate.edu](mailto:kevin.konrad@oregonstate.edu))

- [gchron-6-683-2024-supplement-title-page.pdf](#)
- Okwueze2024 - Supplements
  - [Okweuze2024\\_SupplementalAgeResults.xls](#)

The copyright of individual parts of the supplement might differ from the article licence.
